# Supplementary material for: A Novel Molecular Mechanism for Effector Protein Wrapping and Delivery by the Bacterial Type VI Secretion System
Source: Research Square preprint supplement (doi:10.21203/rs.3.rs-7023205/v1), 2025-08-06
Supplement: Supplementary file 1 [file 0468fae6674b59ad5ce9a85c.docx]

**Supplementary Table 1. Cryo-EM data collection, refinement and validation statistics**

|  | Hcp3-Tce1  (EMDB-53274)  (PDB 9QPE) |
| --- | --- |
| **Data collection and processing** |  |
| Magnification | 130.000x |
| Voltage (kV) | 300 |
| Electron exposure (e–/Å2) | 40 |
| Defocus range (μm) | -1.0 to -2.7 |
| Pixel size (Å) | 0.921 |
| Symmetry imposed | C1 |
| Initial particle images (no.) | 1,039,601 |
| Final particle images (no.) | 166,948 |
| Map resolution (Å)  FSC threshold | 3.8  0.143 |
|  |  |
| **Refinement** |  |
| Initial model used (PDB code) | AlphaFold |
| Model resolution (Å)  FSC threshold | 4.1  0.5 |
| Map sharpening *B* factor (Å2) | -191.4 |
| Model composition  Non-hydrogen atoms  Protein residues  Ligands | 6071  799  0 |
| R.m.s. deviations  Bond lengths (Å)  Bond angles (°) | 0.29  0.51 |
| Validation  MolProbity score  Clashscore  Poor rotamers (%) | 2.07  12.26  0 |
| Ramachandran plot  Favored (%)  Allowed (%)  Disallowed (%) | 92  8  0 |

**Supplementary Table 2.** Details of the interacting residues between Tce1 and each Hcp3 monomer within the hexameric ring and interacting residues between any two neighbouring Hcp3 monomers, calculated using PDBePISA.

| **Interacting residues between Hcp3-1 and Tce1** | | | | |  |
| --- | --- | --- | --- | --- | --- |
|  |  | | |  |  |
| **Tce1** | **Hcp3-1** | | |  |  |
| Hydrogen bonds | | | |  | Distance (Å) |
| GLY127 [ N  ] | SER29 [ OG ] | | |  | 3.78 |
| ARG126 [ NH1] | THR60 [ OG1] | | |  | 3.32 |
|  |  | | |  |  |
| Interfacing surface residues | | | |  |  |
| ILE124 | SER29 | | |  |  |
| ARG125 | TYR30 | | |  |  |
| ARG126 | SER31 | | |  |  |
| GLY127 | THR58 | | |  |  |
| TYR272 | THR60 | | |  |  |
| ASN274 |  | | |  |  |
| THR284 |  | | |  |  |
| CYS285 |  | | |  |  |
| SER286 |  | | |  |  |
| GLY302 |  | | |  |  |
| ASN303 |  | | |  |  |
| GLN304 |  | | |  |  |
|  |  | | |  |  |
|  |  |  |
| **Interacting residues between Hcp3-2 and Tce1** | | | | |  |
|  |  | | |  |  |
| **Tce1** | **Hcp3-2** | | |  |  |
| Hydrogen bonds | | | |  | Distance (Å) |
| SER286 [ O  ] | SER29 [ OG ] | | |  | 2.32 |
| ILE297 [ O  ] | ALA120 [ N  ] | | |  | 3.37 |
|  |  | | |  |  |
| Interfacing surface residues | | | |  |  |
| LYS 268 | MET 28 | | |  |  |
| CYS 285 | SER29 | | |  |  |
| SER 286 | TYR30 | | |  |  |
| LYS 287 | SER31 | | |  |  |
| ALA 288 | THR58 | | |  |  |
| VAL 290 | THR60 | | |  |  |
| LYS 296 | PHE62 | | |  |  |
| ILE 297 | ASN 113 | | |  |  |
| GLU 298 | SER 115 | | |  |  |
| VAL 299 | VAL 116 | | |  |  |
| LEU 300 | SER 117 | | |  |  |
| GLY 301 | GLY 118 | | |  |  |
| GLY 302 | GLY 119 | | |  |  |
| ASN 303 | ALA 120 | | |  |  |
|  | GLY 121 | | |  |  |
|  | GLY 122 | | |  |  |
|  | LYS 123 | | |  |  |
|  |  | | |  |  |
|  |  | | |  |  |
| **Interacting residues between Hcp3-3 and Tce1** | | | | |  |
|  |  | | |  |  |
| **Tce1** | **Hcp3-3** | | |  |  |
| Hydrogen bonds | | | |  | Distance (Å) |
| ARG 208[ NH2] | SER 115[ OG ] | | |  | 3.23 |
| GLU 246[ OE2] | SER 31[ OG ] | | |  | 3.9 |
| GLU 249[ OE1] | THR  60[ OG1] | | |  | 3.78 |
| GLU 249[ OE2] | ASN 113[ ND2] | | |  | 3.04 |
|  |  | | |  |  |
| Interfacing surface residues | | | |  |  |
| ARG 208 | ASP 2 | | |  |  |
| ARG 209 | MET  28 | | |  |  |
| GLN 219 | SER  29 | | |  |  |
| LEU 226 | TYR 30 | | |  |  |
| LYS 231 | SER 31 | | |  |  |
| GLY 244 | ASN  33 | | |  |  |
| ASP 245 | GLU 56 | | |  |  |
| GLU 246 | THR  58 | | |  |  |
| GLU 249 | THR  60 | | |  |  |
| ALA 250 | PHE  62 | | |  |  |
| LEY 253 | ASN 113 | | |  |  |
| GLU 254 | SER 115 | | |  |  |
| ARG 256 | VAL 116 | | |  |  |
| ILE 257 | GLY 118 | | |  |  |
| ALA 258 | ALA 120 | | |  |  |
| ASN 260 | GLY 121 | | |  |  |
| LYS 268 | GLY 122 | | |  |  |
| THR 294 | LYS 123 | | |  |  |
| ASP 295 | VAL 125 | | |  |  |
| LYS 296 | GLU 126 | | |  |  |
| ILE 297 | THR 127 | | |  |  |
| GLU 298 | SER 129 | | |  |  |
| VAL 299 |  | | |  |  |
|  |  | | |  |  |
| **Interacting residues between Hcp3-4 and Tce1** | | | | |  |
|  |  | | |  |  |
|  |  | | |  |  |
| **Tce1** | **Hcp3-4** | | |  |  |
| Hydrogen bonds | | | |  | Distance (Å) |
| ARG 208[ NH2] | ASN  33[ OD1] | | |  | 3.10 |
| ARG 209[ NE ] | GLU  56[ OE2] | | |  | 3.03 |
| ARG 209[ NH1] | SER  31[ OG ] | | |  | 3.07 |
| GLN 219[ NE2] | SER  31[ OG ] | | |  | 3.43 |
|  |  | | |  |  |
| Salt Bridges | | | |  | Distance (Å) |
| ARG 209[ NE ] | GLU  56[ OE2] | | |  | 3.03 |
| ARG 209[ NH2] | GLU  56[ OE2] | | |  | 4.00 |
|  |  | | |  |  |
| Interfacing surface residues | | | |  |  |
| TYR 158 | MET1 | | |  |  |
| ALA159 | MET28 | | |  |  |
| VAL162 | SER29 | | |  |  |
| ARG163 | TYR30 | | |  |  |
| GLY166 | SER31 | | |  |  |
| ARG208 | HIS32 | | |  |  |
| ARG209 | ASN33 | | |  |  |
| VAL1210 | GLU56 | | |  |  |
| LYS213 | THR58 | | |  |  |
| GLU217 | LEU59 | | |  |  |
| GLN219 | THR60 | | |  |  |
| ALA220 | PHE62 | | |  |  |
| ALA223 | ASN113 | | |  |  |
| THR224 | SER117 | | |  |  |
| LEU226 | GLY118 | | |  |  |
| GLU227 | GLY119 | | |  |  |
| LEU228 | ALA120 | | |  |  |
| GLU254 | GLY121 | | |  |  |
| ILE257 | GLY122 | | |  |  |
| ALA258 | LYS124 | | |  |  |
| ASN260 | VAL125 | | |  |  |
|  | THR127 | | |  |  |
|  |  | | |  |  |
|  |  | | |  |  |
| **Interacting residues between Hcp3-5 and Tce1** | | | | |  |
|  |  | | |  |  |
| **Tce1** | **Hcp3-5** | | |  |  |
| Hydrogen bonds | | | |  | Distance (Å) |
| GLN 214[ NE2] | GLU  56[ OE2] | | |  | 3.37 |
|  |  | | |  |  |
| Interfacing surface residues | | | |  |  |
| ASP 155 | MET 28 | | |  |  |
| THR 156 | SER29 | | |  |  |
| ASN 157 | TYR30 | | |  |  |
| TYR 158 | SER31 | | |  |  |
| ALA 159 | ASN33 | | |  |  |
| GLN 160 | GLU56 | | |  |  |
| ASN 196 | THR58 | | |  |  |
| ALA 203 | THR60 | | |  |  |
| GLN 214 | LYS61 | | |  |  |
|  | PHE62 | | |  |  |
|  | SER115 | | |  |  |
|  | SER117 | | |  |  |
|  | VAL125 | | |  |  |
|  | THR127 | | |  |  |
|  |  | | |  |  |
|  |  | | |  |  |
| **Interacting residues between Hcp3-6 and Tce1** | | | | |  |
|  |  | | |  |  |
| **Tce1** | **Hcp3-6** | | |  |  |
| Hydrogen bonds | | | |  | Distance (Å) |
| N/A | N/A | | |  | N/A |
|  |  | | |  |  |
| Interfacing surface residues | | | |  |  |
| ILE 124 | SER29 | | |  |  |
| ARG125 | SER31 | | |  |  |
| LYS153 | ASN33 | | |  |  |
| ASP155 | SER117 | | |  |  |
| ASN196 | GLY118 | | |  |  |
|  | GLY119 | | |  |  |
|  | GLY122 | | |  |  |
|  | LYS123 | | |  |  |
|  | VAL125 | | |  |  |
|  | THR127 | | |  |  |
|  |  | | |  |  |
| **Interacting residues between any two Hcp3 monomer neighbours** | | | | | |
|  |  | | |  |  |
| **Neighbour +1** | **Neighbour -1** | | |  |  |
| Hydrogen bonds | | | |  | Distance (Å) |
| THR69[ OG1] | SER154[ OG ] | | |  | 3.26 |
| VAL114[ N  ] | VAL34[ O  ] | | |  | 3.02 |
| SER115[ OG ] | HIS32[ O  ] | | |  | 2.38 |
| VAL116[ N  ] | HIS32[ O  ] | | |  | 2.86 |
| GLY118[ N  ] | TYR30[ O  ] | | |  | 3.27 |
| GLY121[ N  ] | MET1[ O  ] | | |  | 3.23 |
| GLY118[ O  ] | SER29[ OG ] | | |  | 2.34 |
| GLY118[ O  ] | TYR30[ N  ] | | |  | 3.41 |
| VAL116[ O  ] | HIS32[ N  ] | | |  | 2.63 |
| VAL114[ O  ] | VAL34[ N  ] | | |  | 3.08 |
| SER112[ O  ] | MET36[ N  ] | | |  | 3.25 |
|  |  | | |  |  |
| Interfacing surface residues | | | |  |  |
| ASP15 | MET1 | | |  |  |
| ILE63 | ASP2 | | |  |  |
| ASP64 | ALA3 | | |  |  |
| THR65 | ILE4 | | |  |  |
| THR67 | MET28 | | |  |  |
| PRO68 | SER29 | | |  |  |
| THR69 | TYR30 | | |  |  |
| ASN71 | SER31 | | |  |  |
| GLU72 | HIS32 | | |  |  |
| TYR73 | ASN33 | | |  |  |
| CYS74 | VAL34 | | |  |  |
| CYS75 | ALA35 | | |  |  |
| VAL 110 | MET36 | | |  |  |
| LEU 111 | ILE87 | | |  |  |
| SER 112 | ARG89 | | |  |  |
| ASN 113 | PHE101 | | |  |  |
| VAL 114 | ILE102 | | |  |  |
| SER 115 | TYR104 | | |  |  |
| VAL 116 | ILE135 | | |  |  |
| SER 117 | TRP137 | | |  |  |
| GLY 118 | GLU138 | | |  |  |
| GLY 119 | LEY139 | | |  |  |
| ALA 120 | ALA141 | | |  |  |
| GLY 121 | ALA152 | | |  |  |
| GLY 122 | ALA153 | | |  |  |
| LYS 123 | SER154 | | |  |  |
| PRO 124 | THR155 | | |  |  |
| GLU126 |  | | |  |  |

**Supplementary Table 3: Strains and plasmids**

| **Strain or plasmid** | **Genotype** | **Description** | **Reference** |
| --- | --- | --- | --- |
| *E.coli* Top10 | Strain used for cloning. F- *mcrA* Δ(*mrr-hsdRMS-mcrBC*) φ80 *lacZ*ΔM15Δ *lacX74 recA1 ara*Δ139Δ(ara-leu)7697 *galU galK rpsL* (StrR) *endA1 nupG* | Cloning strain | Invitrogen |
| *E.coli* BL21 (λDE3) | Strain used for protein expression. F– *ompT gal dcm lon hsdSB*(rB–mB–) λ(DE3 [*lacI lacUV5-*  *T7p07 ind1 sam7 nin5*]) [*malB*+]K-12(λS). |  | Laboratory Collection |
| *E. coli* XL-1 Blue | *recA1 endA1 gyrA96 thi-1*  *hsdR17* *supE44 relA1* lac [F’  *proAB* *lacI*q Z∆*M15* Tn*10*  (TetR)] | Cloning strain | Novagen |
| *E. coli* BL21 (DE3) pLysS |  |  |  |
| *S. cerevisae* BY4742 | MATα *his3*Δ1 *leu2*Δ0 *lys2*Δ0 *ura3*Δ0 | Auxotrophic yeast strain for plasmid expression | Gift from Joseph Mougous |
| pET22b: *HA-Tce1* |  | Expression strain for *Tce1* with N-terminal HA-tag, *pelB* leader seq and *his*-tag removed from plasmid, ApR | Laboratory Collection |
| pACYC: *hcp3-his* |  | Expression strain for *hcp3* with C-terminal *his*-tag in pACYC-duet MCS1, CmR | Laboratory Collection |
| pACYC: *hcp3*G121W-his* |  | Expression strain for *hcp3*G121W* with C-terminal *his*-tag in pACYC-duet MCS1, CmR | This study |
| pACYC: *hcp3*G121W,K123W-his* |  | Expression strain for *hcp3*G121W,K123W* with C-terminal *his*-tag in pACYC-duet MCS1, CmR | This study |
| pET29b |  | Expression vector with *lacI*, T7 promoter, C-terminal His6 tag, KanR | Novagen |
| pSCrhaB2-CV |  | Expression vector with P*rhaB*,  C-terminal VSV-G tag, TmpR | PMID: **15925406** |
| pRB1438 |  | Yeast expression vector carrying the bi-directional Gal1,10 promoter element  (*URA3, CEN*, AmpR) | Gift from Sarah Coulthurst |
| pET29b::PA2367_His |  | IPTG inducible expression of *PA2367* (*hcp3*) | This study |
| pSCrhaB2-CV::Tce1_FLAG |  | Rhamnose inducible *E. coli* expression of *Tce1* | This study |
| pSCrhaB2-CV::Tse6_VSV-G |  | Rhamnose inducible *E. coli* expression of  *PA14_01140* | PMID: 31695193 |
| pSCrhaB2-CV::Tce2_VSV-G |  | Rhamnose inducible *E. coli* expression of *Tce2* | This study |
| pRB1438::Tce1_His6 |  | Galactose inducible expression of *Tce1* | This study |
| pRB1438::Tce1_His6_Hcp3 |  | Divergent expression of *Tce1* and *PA2367 (hcp3)* under control of the bi-directional Gal1,10 promoter | This study |
| pRB1438::Tce1CTD_His6 |  | Galactose inducible expression of *Tce1* residues 108-310 | This study |
| pRB1438::Tce1CTD_His6_Hcp3 |  | Divergent expression of *Tce1* residues 108-310and *PA2367 (hcp3)* under control of the bi-directional Gal1,10 promoter | This study |
| pRB1438::Tce2_His6 |  | Galactose inducible expression of *Tce2* | This study |
| pRB1438::Tce2_C115S_His6 |  | Galactose inducible expression of *Tce2* | This study |

**Supplementary Table 4: Oligonucleotide primersa,b,c,d**

| **Primer name** | **Purpose** | **Sequence** |
| --- | --- | --- |
| G121W_Fw | Clone Hcp3 with G121W point mutation and C-terminal His into pACYCDuet-1 | CGGCGCCTGGGGCAAGCCGGTGGAGACC |
| G121W_Rev | TTGCCCCAGGCGCCGCCGCTGACGCTGACG |
| G121W_K123W_Fw | Clone Hcp3 with G121W, K123W point mutations and C-terminal His into pACYCDuet-1 | CGCCTGGGGCTGGCCGGTGGAGACCCTGTCG |
| G121W_K123W_Rev | GGCCAGCCCCAGGCGCCGCCGCTGACGCTGACG |
| pSCrhaB2_Tce1_F | Clone *Tce1* with C-terminal FLAG in pSCrhaB2 | TGTTAAGCTACATATGCGCTCATGGCATGGCG |
| pSCrhaB2_Tce1_R | AAGCTAGGATCCCTA**CTTGTCATCGTCGTCCTTGTAGTC**GATATCGAATACCGGTACCTG |
| pSCrhaB2_Tce2_F | Clone *Tce2* with C-terminal VSV-G in pSCrhaB2 | TGTTAAGCTACATATGAACTATTTATTCGTGCCATTCACAAGC |
| pSCrhaB2_Tce2_R | TGTTAAGCTATCTAGAGGAAGCAAGACAGAGAGTACCT |
| pET29b_Hcp3_F | Clone *PA2367* (Hcp3) with C-terminal His6 in pET29b | TGTTAAGCTACATATGGATGCGATCATTCTCG |
| pET29b_Hcp3_R | TGTTAAGCTACTCGAGCTTGACCAACTGGTTGGC |
| pRB1438_Tce1_F | Clone *Tce1* with C-terminal His6 in pRB1438 | TGTTAAGCTAGGATCCATGCGCTCATGGCATGGCG |
| pRB1438_Tce1_R | AAGCTAGAGCTCCTA**GTGATGGTGATGGTGATG**GTCGATATCGAATACCGGTACCTG |
| pRB1438_Tce1_CTD_F | Clone *Tce1* 108-310 (CTD)with C-terminal His6 in pRB1438 | TGTTAAGCTAGGATCCATGGTCAGGAAAGGGGCGGTC |
| pRB1438_Tce1_CTD_R | AAGCTAGAGCTCCTA**GTGATGGTGATGGTGATG**GTCGATATCGAATACCGGTACCTG |
| pRB1438_Tce2_F | Clone *Tce2* with C-terminal His6 in pRB1438 | TGTTAAGCTATCTAGAATGAACTATTTATTCGTGCCATTCAC |
| pRB1438_Tce2_R | TGTTAAGCTAGAGCTCCTA**GTGATGGTGATGGTGATG**AGGTACTCTCTGTCTTGCTTCC |
| pRB1438_Tce2_C115S_F | Overlapping mutagenesis to make C115S variant of Tce2 with SOE PCR | GCTCTACGTAagcAACTCAGGGG |
| pRB1438_Tce2_ C115S_R | CCCCTGAGTTgctTACGTAGAGC |
| pRB1438_Hcp3_F | Clone *PA2367* (Hcp3) into pRB1438 or pRB1438::*Tce1* using Gibson assembly | *AGAATTTTTGAAAATTCAAGGAATTC*ATGGATGCGATCATTCTCGATTTCG |
| pRB1438_Hcp3_R | *CCCCCCTCGACGGTATCGATAAGCTT*TCACTTGACCAACTGGTTGGCG |

aRestriction enzyme sites are underlined

bTag encoding sequences are bolded

cMutations are shown in lower case

dGibson overlaps are indicated with italics
